# Supplementary material for: Mesoporous separation membranes of {[Cu(BTC–H2)2·(H2O)2]·3H2O} nanobelts synthesized by ultrasonication at room temperature
Source: Royal Society of Chemistry journal article supplement (doi:10.1039/c2ce26302e), 2012-10-23
Supplement: c2ce26302e.pdf [file c2ce26302e.pdf]

## Electronic Supplementary Information

### Mesoporous separation membranes of $\{[\text{Cu}(\text{BTC}-\text{H}_2)_2 \cdot (\text{H}_2\text{O})_2] \cdot 3\text{H}_2\text{O}\}$ nanobelts synthesized by ultrasonication at room temperature

*Yiyin Mao, Li Shi, Hubiao Huang, Qing Yu, Zhizhen Ye, Xinsheng Peng\**

State Key Laboratory of Silicon Materials, Department of Materials Science and Engineering,  
Zhejiang University, Hangzhou, 310027, P. R. China

Email: pengxinsheng@zju.edu.cn

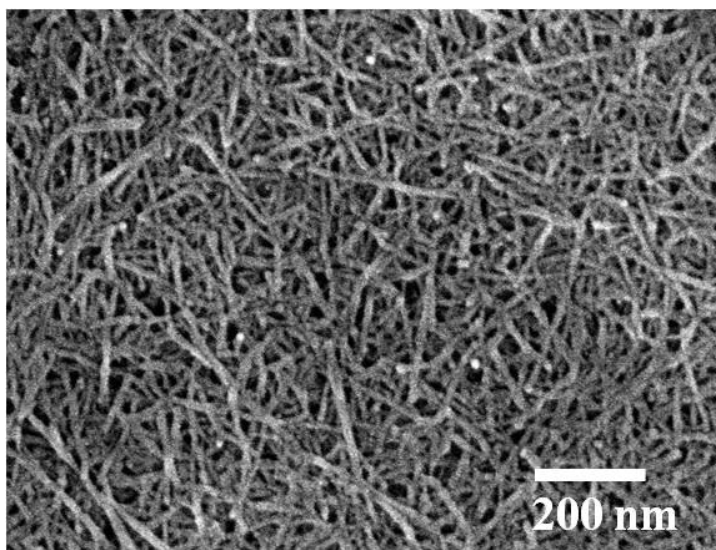

**Figure S1** Copper hydroxide nanostrands prepared by mixing equal volume 1.4 mM NaOH with 4 mM  $\text{Cu}(\text{NO}_3)_2$  after 30 mins at room temperature.

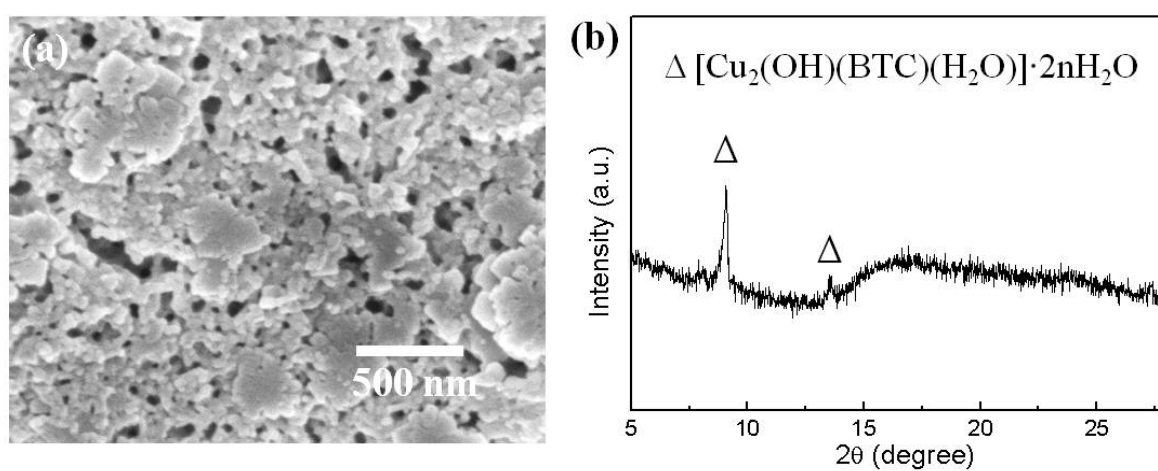

**Figure S2** SEM image and XRD of the sample prepared by mixing the mixture of 15 ml, 1.4 mM NaOH and 3 ml, 1 mM BTC with 15 ml, 4 mM  $\text{Cu}(\text{NO}_3)_2$  by ultrasonication for 30 mins.
